# Supplementary material for: Genome-wide meta-analysis of myasthenia gravis uncovers new loci and provides insights into polygenic prediction
Source: PubMed Central journal article supplement (PMC11560923; doi:10.1038/s41467-024-53595-6), 2024-11-13
Supplement: 41467_2024_53595_MOESM3_ESM.pdf [file 41467_2024_53595_MOESM3_ESM.pdf]

## Description of Additional Supplementary Files

File Name: Supplementary Data 1

Description: MG discovery GWAS summary statistics for SNPs with  $p < 1e-4$  from an inverse-variance-weighted fixed-effects meta-analysis

|                                 |                                                                                                                                 |
|---------------------------------|---------------------------------------------------------------------------------------------------------------------------------|
| <i>SNP</i>                      | name of variant                                                                                                                 |
| <i>CHR</i>                      | chromosome                                                                                                                      |
| <i>BP</i>                       | base pair position (hg19)                                                                                                       |
| <i>P</i>                        | <i>P</i> -value                                                                                                                 |
| <i>OR</i>                       | odds ratio                                                                                                                      |
| <i>SE</i>                       | standard error                                                                                                                  |
| <i>A1/A2</i>                    | allele 1 and allele 2                                                                                                           |
| <i>FRQ_A</i>                    | frequency of allele1 in affected cases                                                                                          |
| <i>FRQ_U</i>                    | frequency of allele1 in unaffected controls                                                                                     |
| <i>INFO</i>                     | imputation info score                                                                                                           |
| <i>ngt</i>                      | number of studies in which this variant was genotyped (vs. imputed)                                                             |
| <i>LD-friends(0.1).p1</i>       | list of all variants with $LD-r2 > 0.1$ to index SNP, in brackets $LD-r2$ and distance in kb sorted by $LD-r2$                  |
| <i>range.left</i>               | left margin of region (defined by LD friends)                                                                                   |
| <i>range.right</i>              | right margin of region (defined by LD friends)                                                                                  |
| <i>span(kb)</i>                 | right margin - left margin (in kb)                                                                                              |
| <i>LD-friends(0.6).p</i>        | <i>range.left.6</i> , <i>range.right.6</i> , and <i>span.6(kb)</i> as before but with $LD-r2$ of 0.6 <i>gwas_catalog_span.6</i> |
| <i>genes.6.50kb(dist2index)</i> | list of genes within the region of friends.6 ( $\pm 50$ kb), in brackets distance to index SNP in kb.                           |

File Name: Supplementary Data 2

Description: EOMG discovery GWAS summary statistics for SNPs with  $p < 1e-4$  from an inverse-variance-weighted fixed-effects meta-analysis

See legend of Supplementary Data 1.

File Name: Supplementary Data 3

Description: LOMG discovery GWAS summary statistics for SNPs with  $p < 1e-4$  from an inverse-variance-weighted fixed-effects meta-analysis

See legend of Supplementary Data 1.

File Name: Supplementary Data 4

Description: HLA alleles associated with MG from an inverse-variance-weighted fixed-effects meta-analysis

|                     |                                                                                                             |
|---------------------|-------------------------------------------------------------------------------------------------------------|
| <i>HLA allele</i>   | The specific HLA allele being analyzed.                                                                     |
| <i>BP</i>           | The base pair position of the allele on the chromosome.                                                     |
| <i>Frq cases</i>    | Frequency of the allele in individuals with the condition (cases).                                          |
| <i>Frq controls</i> | Frequency of the allele in individuals without the condition (controls).                                    |
| <i>OR</i>           | Odds Ratio, representing the likelihood of association between the allele and the condition.                |
| <i>SE</i>           | Standard Error of the Odds Ratio, indicating the variability of the estimate.                               |
| <i>P</i>            | P-value, representing the statistical significance of the association between the allele and the condition. |

File Name: Supplementary Data 5

Description: HLA alleles associated with EOMG from an inverse-variance-weighted fixed-effects meta-analysis

See legend of Supplementary Data 4.

File Name: Supplementary Data 6

Description: HLA alleles associated with LOMG from an inverse-variance-weighted fixed-effects meta-analysis

See legend of Supplementary Data 4.

File Name: Supplementary Data 7

Description: C4 association analysis results from an inverse-variance-weighted fixed-effects meta-analysis

|                            |                                                                                                                                              |
|----------------------------|----------------------------------------------------------------------------------------------------------------------------------------------|
| <i>Phenotype</i>           | The specific phenotype being studied (Early onset myasthenia gravis; EOMG, Late onset; LOMG, or combined; MG).                               |
| <i>C4 gene composition</i> | The composition or variant of the C4 gene associated with the phenotype.                                                                     |
| <i>OR</i>                  | Odds Ratio, representing the likelihood of association between the C4 gene composition and the phenotype.                                    |
| <i>95% CI_Lower</i>        | The lower bound of the 95% Confidence Interval for the Odds Ratio, indicating the range within which the true effect size is likely to fall. |
| <i>95% CI_Upper</i>        | The upper bound of the 95% Confidence Interval for the Odds Ratio.                                                                           |
| <i>P-value</i>             | The statistical significance of the association between the C4 gene composition and the phenotype.                                           |

File Name: Supplementary Data 8

Description: FUMA prioritized genes within RICOPILI locus boundaries

|                                            |                                                                                                                                                                                    |
|--------------------------------------------|------------------------------------------------------------------------------------------------------------------------------------------------------------------------------------|
| <i>ensg</i>                                | ENSG ID                                                                                                                                                                            |
| <i>symbol</i>                              | Gene Symbol                                                                                                                                                                        |
| <i>chr</i>                                 | chromosome                                                                                                                                                                         |
| <i>start</i>                               | Starting position of the gene                                                                                                                                                      |
| <i>end</i>                                 | Ending position of the gene                                                                                                                                                        |
| <i>strand</i>                              | Strand of the gene                                                                                                                                                                 |
| <i>type</i>                                | Gene biotype from Ensembl                                                                                                                                                          |
| <i>entrezID</i>                            | <i>entrez ID (if available)</i>                                                                                                                                                    |
| <i>HUGO</i>                                | <i>HUGO (HGNC) gene symbol</i>                                                                                                                                                     |
| <i>pLI</i>                                 | <i>pLI score from ExAC database. The probability of being loss-of-function intolerant. The higher the score is, the more intolerant to loss-of-function mutations the gene is.</i> |
| <i>ncRVIS</i>                              | <i>Non-coding residual variation intolerance score. The higher the score is, the more intolerant to non-coding variation the gene is.</i>                                          |
| <i>posMapSNPs</i><br>( <i>posMap</i> )     | <i>Number of SNPs mapped to gene based on positional mapping (after functional filtering if parameters are given).</i>                                                             |
| <i>posMapMaxCADD</i><br>( <i>posMap</i> )  | <i>The maximum CADD score of mapped SNPs by positional mapping.</i>                                                                                                                |
| <i>eqtlMapSNPs</i><br>( <i>eqtlMap</i> )   | <i>Number of SNPs mapped to the gene based on eQTL mapping.</i>                                                                                                                    |
| <i>eqtlMapminP</i><br>( <i>eqtlMap</i> )   | <i>The minimum eQTL P-value of mapped SNPs.</i>                                                                                                                                    |
| <i>eqtlMapminQ</i><br>( <i>eqtlMap</i> )   | <i>The minimum eQTL FDR of mapped SNPs.</i>                                                                                                                                        |
| <i>eqtlMaptypes</i> ( <i>eqtlMap</i> )     | <i>Tissue types of mapped eQTL SNPs.</i>                                                                                                                                           |
| <i>eqtlDirection</i><br>( <i>eqtlMap</i> ) | <i>Consequential direction of mapped eQTL SNPs after aligning risk increasing alleles in GWAS and tested alleles in eQTL data source.</i>                                          |
| <i>ciMap</i> ( <i>ciMap</i> )              | <i>Yes, if the gene is mapped by chromatin interaction mapping, "No" otherwise.</i>                                                                                                |
| <i>ciMaptypes</i> ( <i>ciMap</i> )         | <i>Tissue/cell types of mapped chromatin interactions.</i>                                                                                                                         |
| <i>minGwasP</i>                            | <i>The minimum P-value of mapped SNPs.</i>                                                                                                                                         |
| <i>IndSigSNPs</i>                          | <i>rsID of the independent significant SNPs that are in LD with the mapped SNPs.</i>                                                                                               |
| <i>GenomicLocus</i>                        | <i>Index of genomic loci where mapped SNPs are from. Multiple loci can be assigned with ":" delimiter.</i>                                                                         |

File Name: Supplementary Data 9

Description: FUMA annotated variants across credible sets

|                       |                                                                                                                                                                                                                                                                                                                       |
|-----------------------|-----------------------------------------------------------------------------------------------------------------------------------------------------------------------------------------------------------------------------------------------------------------------------------------------------------------------|
| <i>SNP</i>            | name of variant                                                                                                                                                                                                                                                                                                       |
| <i>CHR</i>            | chromosome                                                                                                                                                                                                                                                                                                            |
| <i>BP</i>             | base pair position (hg19)                                                                                                                                                                                                                                                                                             |
| <i>pip</i>            | Posterior inclusion probability                                                                                                                                                                                                                                                                                       |
| <i>uniqID</i>         | CHR:Position                                                                                                                                                                                                                                                                                                          |
| <i>gene</i>           | ENSG ID                                                                                                                                                                                                                                                                                                               |
| <i>nearestGene</i>    | The nearest Gene of the SNP based on ANNOVAR annotations. Note that ANNOVAR annotates "consequence" function by prioritising the most deleterious annotation for SNPs which are locating a genomic region where multiple genes are overlapped. Genes are encoded in symbol, if it is available, otherwise Ensembl ID. |
| <i>dist</i>           | Distance to the nearest gene. SNPs which are locating in the gene body or 1kb up- or down-stream of TSS or TES have 0.                                                                                                                                                                                                |
| <i>func</i>           | Functional consequence of the SNP on the gene obtained from ANNOVAR. For exonic SNPs, detail annotation (e.g. non-synonymous, stop gain and so on) is available in ANNOVAR table (annov.txt).                                                                                                                         |
| <i>CADD</i>           | CADD score which is computed based on 63 annotations. 'NA' if not available.                                                                                                                                                                                                                                          |
| <i>RDB</i>            | RegulomeDB score which is the categorical score (from 1a to 7). 1a is the highest score that the SNP has the most biological evidence to be regulatory element.                                                                                                                                                       |
| <i>minChrState</i>    | The minimum 15-core chromatin state across 127 tissue/cell type.                                                                                                                                                                                                                                                      |
| <i>commonChrState</i> | The most common 15-core chromatin state across 127 tissue/cell types.                                                                                                                                                                                                                                                 |
| <i>posMapFilt</i>     | Whether the SNP was used for positional mapping or not. 1 is used, otherwise 0. When positional mapping is not performed, all SNPs have 0.                                                                                                                                                                            |
| <i>eQTLMapFilt</i>    | Whether the SNP was used for eQTL mapping or not. 1 is used, otherwise 0. When eQTL mapping is not performed, all SNPs have 0.                                                                                                                                                                                        |
| <i>ciMapFilt</i>      | Whether the SNP was used for chromatin interaction mapping or not. 1 is used, otherwise 0. When chromatin interaction mapping is not performed, all SNPs have 0.                                                                                                                                                      |

File Name: Supplementary Data 10

Description: Transcriptome-wide association study, permutation, and co-localization tests, permutation, and co-localization tests results  $p < 1e-4$

|              |                                                       |
|--------------|-------------------------------------------------------|
| PANEL        | The GTEx panel used                                   |
| FILE         | Full path to the reference weight file used           |
| ID           | Feature/gene identifier, taken from --weights file    |
| CHR          | Chromosome                                            |
| P0           | Gene start (from --weights)                           |
| P1           | Gene end (from --weights)                             |
| HSQ          | Heritability of the gene                              |
| BEST.GWAS.ID | rsID of the most significant GWAS SNP in locus        |
| BEST.GWAS.Z  | Z-score of the most significant GWAS SNP in locus     |
| EQTL.ID      | rsID of the best eQTL in the locus                    |
| EQTL.R2      | cross-validation R2 of the best eQTL in the locus     |
| EQTL.Z       | Z-score of the best eQTL in the locus                 |
| EQTL.GWAS.Z  | GWAS Z-score for this eQTL                            |
| NSNP         | Number of SNPs in the locus                           |
| MODEL        | Best performing model                                 |
| MODEL.CV.R2  | cross-validation R2 of the best performing model      |
| MODEL.CV.PV  | cross-validation P-value of the best performing model |
| TWAS.Z       | TWAS Z-score (our primary statistic of interest)      |
| TWAS.P       | TWAS P-value                                          |

File Name: Supplementary Data 11

Description: MG-PRS performance combined MG target sample scored

|                       |                                                                               |
|-----------------------|-------------------------------------------------------------------------------|
| <i>PT</i>             | P-value threshold                                                             |
| <i>N</i>              | Sample Size                                                                   |
| <i>Propcase</i>       | Population prevalence of cases                                                |
| <i>NKr2</i>           | Nagelkerke's Pseudo R2                                                        |
| <i>pval</i>           | P-value                                                                       |
| <i>PopRisk</i>        | Population Risk                                                               |
| <i>h2l_r2n</i>        | Proportion of variance explained on the liability scale                       |
| <i>se_h2l_r2</i>      | Standard Error of the proportion of variance explained on the liability scale |
| <i>AUC</i>            | Area Under the Curve, representing model performance                          |
| <i>OR10decile</i>     | Odds Ratio for the 10th Decile                                                |
| <i>ORL95</i>          | Odds Ratio Lower 95% Confidence Interval                                      |
| <i>ORH95</i>          | Odds Ratio Upper 95% Confidence Interval                                      |
| <i>Ncase</i>          | Number of Cases                                                               |
| <i>Ncontrol</i>       | Number of Controls                                                            |
| <i>Coeff_with_cov</i> | Coefficient with Covariates Included                                          |

File Name: Supplementary Data 12

Description: MG-PRS performance in EOMG target sample derived from logistic regression models

See legend of Supplementary Data 11.

File Name: Supplementary Data 13

Description: MG-PRS performance in LOMG target sample derived from logistic regression models

See legend of Supplementary Data 11.

File Name: Supplementary Data 14

Description: MG-PRS performance in AChR negative target sample derived from logistic regression models

See legend of Supplementary Data 11.

File Name: Supplementary Data 15

Description: MG-PRS performance in AChR positive target sample derived from logistic regression models

See legend of Supplementary Data 11.

File Name: Supplementary Data 16

Description: Genetic correlation of MG with other complex traits via linkage disequilibrium score regression

|                    |                                                                              |
|--------------------|------------------------------------------------------------------------------|
| <i>Trait</i>       | "Trait 2", for which the genetic correlation with MG was calculated.         |
| <i>Publication</i> | The original publication of the GWAS summary statistics                      |
| <i>N</i>           | The sample size of the summary statistics used                               |
| <i>rg</i>          | Genetic correlation                                                          |
| <i>se</i>          | Standard error of <i>rg</i>                                                  |
| <i>p</i>           | P-value for <i>rg</i>                                                        |
| <i>h2_obs</i>      | Observed scale heritability for Trait 2                                      |
| <i>h2_obs_se</i>   | Standard error of observed scale heritability for Trait 2                    |
| <i>h2_int</i>      | Single-trait LD Score regression intercept for Trait 2                       |
| <i>h2_int_se</i>   | Standard error of the single-trait LD Score regression intercept for Trait 2 |
| <i>gcov_int</i>    | Cross-trait LD Score regression intercept                                    |
| <i>gcov_int_se</i> | Standard error of the cross-trait LD Score regression intercept              |

File Name: Supplementary Data 17

Description: Genetic correlation of EOMG with other complex traits via linkage disequilibrium score regression

See legend of Supplementary Data 16.

File Name: Supplementary Data 18

Description: Genetic correlation of LOMG with other complex traits via linkage disequilibrium score regression

See legend of Supplementary Data 16.

File Name: Supplementary Data 19

Description: Genetic correlation of MG with medical endpoints in FinnGen R8 via linkage disequilibrium score regression  $p < 5e-2$

|                    |                                                                                      |
|--------------------|--------------------------------------------------------------------------------------|
| <i>LONGNAME</i>    | Long name of the phenotype if applicable                                             |
| <i>Phenotypes</i>  | The phenotype ("Trait 2"), for which the genetic correlation with MG was calculated. |
| <i>Category</i>    | International Classification of Diseases chapter if applicable                       |
| <i>n_cases</i>     | Sample size of cases                                                                 |
| <i>n_control</i>   | Sample size of controls                                                              |
| <i>sample_size</i> | FinnGen dataset sample size                                                          |
| <i>rg</i>          | Genetic correlation                                                                  |
| <i>se</i>          | Standard error of <i>rg</i>                                                          |
| <i>p</i>           | P-value for <i>rg</i>                                                                |
| <i>h2_obs</i>      | Observed scale heritability for Trait 2                                              |
| <i>h2_obs_se</i>   | Standard error of observed scale heritability for Trait 2                            |
| <i>h2_int</i>      | Single-trait LD Score regression intercept for Trait 2                               |
| <i>h2_int_se</i>   | Standard error of the single-trait LD Score regression intercept for Trait 2         |
| <i>gcov_int</i>    | Cross-trait LD Score regression intercept                                            |
| <i>gcov_int_se</i> | Standard error of the cross-trait LD Score regression intercept                      |

File Name: Supplementary Data 20

Description: Sample overview for MG datasets

|                    |                                                                                                         |
|--------------------|---------------------------------------------------------------------------------------------------------|
| <i>Dataset</i>     | The name of the specific dataset used.                                                                  |
| <i>N cases</i>     | The number of cases included in the analysis.                                                           |
| <i>N controls</i>  | The number of control subjects included in the analysis.                                                |
| <i>PubMed ID</i>   | The identifier for the associated publication in PubMed, if applicable.                                 |
| <i>Data source</i> | The source from which the data was obtained (individual-level genotypes or summary statistics).         |
| <i>Phenotype</i>   | Indicates whether the included case phenotype was based on a specific antibody profile and/or ICD-Code. |

File Name: Supplementary Data 21

Description: Sample overview EOMG datasets

See legend of Supplementary Data 20.



File Name: Supplementary Data 22  
Description: Sample overview LOMG datasets

See legend of Supplementary Data 20.

File Name: Supplementary Data 23  
Description: Neurological and autoimmune-related ICD-9 and ICD-10 codes used to exclude control subjects

|                    |                                                                   |
|--------------------|-------------------------------------------------------------------|
| <i>Diagnosis</i>   | The medical diagnosis being referred to.                          |
| <i>ICD-10 Code</i> | The International Classification of Diseases, 10th Revision code. |
| <i>ICD-9 Code</i>  | The International Classification of Diseases, 9th Revision code.  |
